# Supplementary material
Source: HighWire-hosted journal article supplement (https://gut.bmj.com/content/70/4/807)

Supplementary figure 1: Flow diagram for literature search.

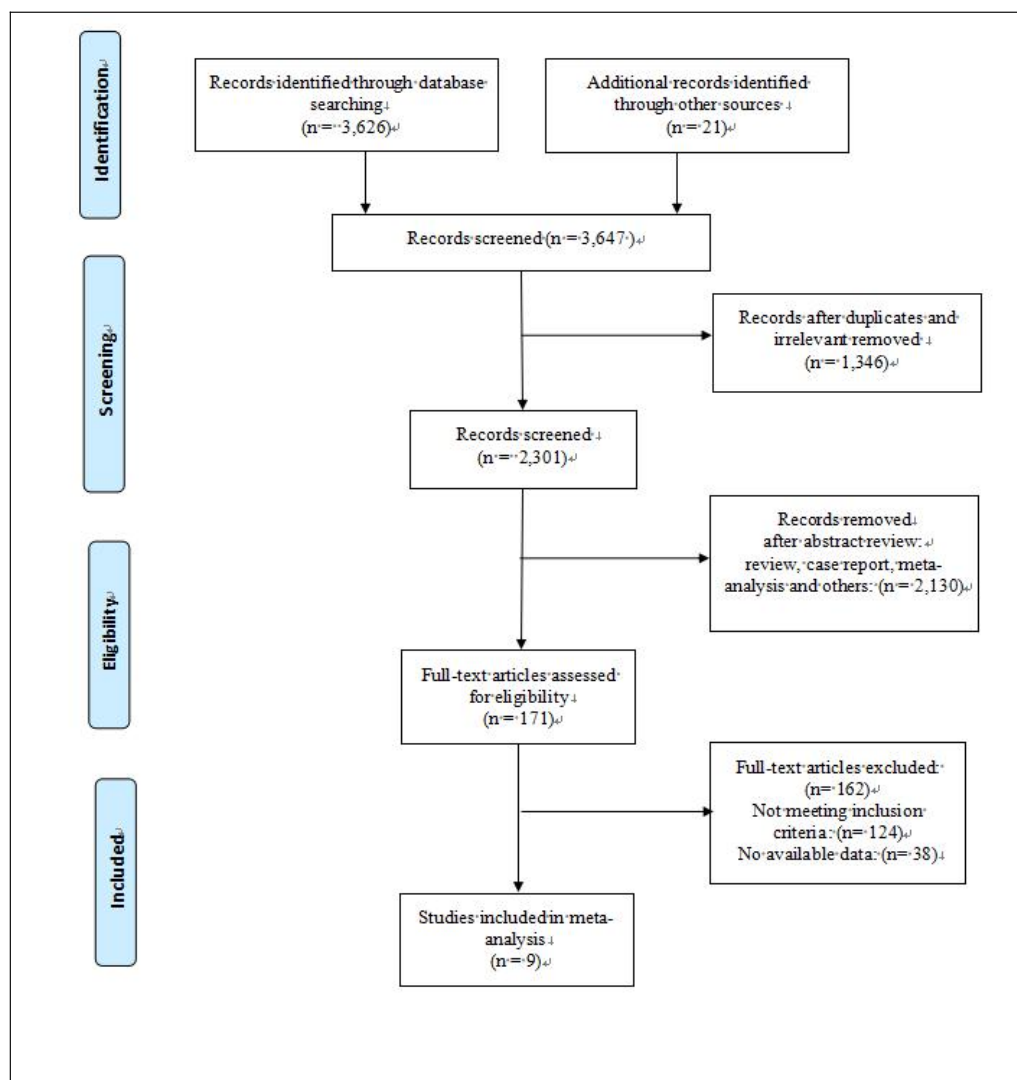

**Supplementary figure 2: Forest plot for age between patients with liver injury and patients without liver injury**

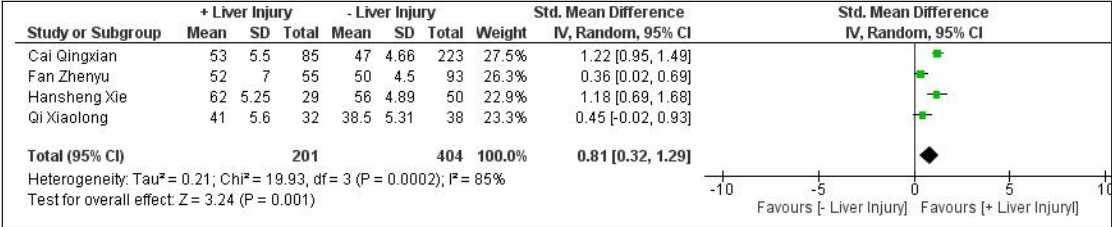

**Supplementary figure 3: Forest plot for Lopinavir/ritonavir used in the treatment of COVID-19 patients**

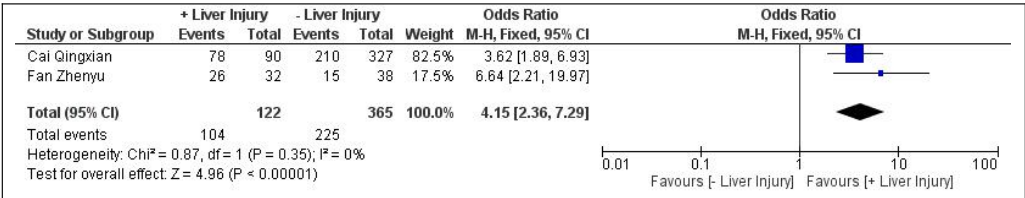

Supplement: inline-supplementary-material-1 [file inline-supplementary-material-1.pdf]
